# Supplementary material for: Combination of CD49b and CD229 Reveals a Subset of Multipotent Progenitors With Short-Term Activity Within the Hematopoietic Stem Cell Compartment
Source: PubMed Central journal article supplement (PMC10630077; doi:10.1093/stcltm/szad057), 2023-09-14
Supplement: szad057_suppl_supplementary_material.pdf [file szad057_suppl_supplementary_material.pdf]

Figure S1, related to Figure 1-2

A

Pre-gated on: Lineage<sup>-</sup>Sca-1<sup>+</sup>c-kit<sup>+</sup>CD48<sup>-</sup>CD34<sup>-</sup>CD150<sup>hi</sup>

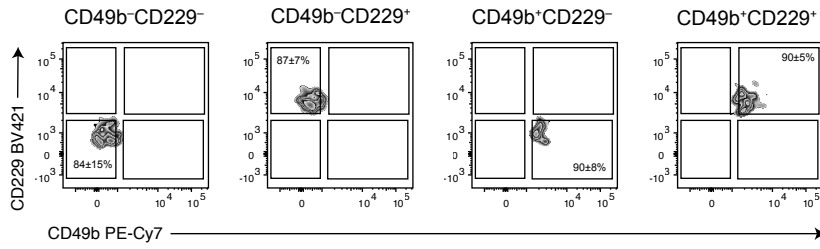

B

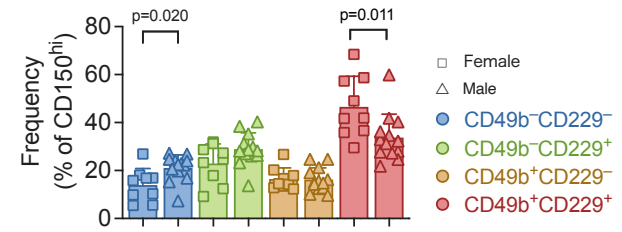

C

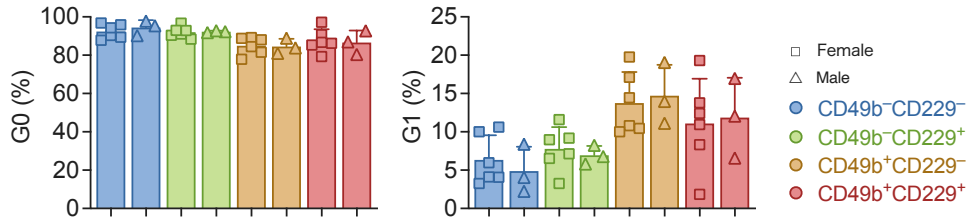

D

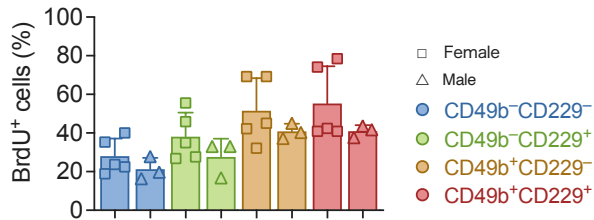

E

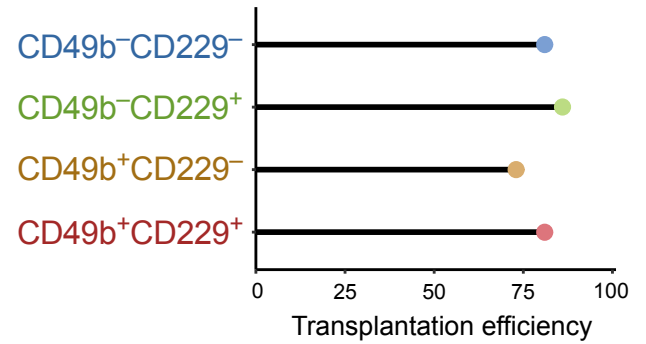

**Supplementary Figure S1, related to Figure 1-2.** CD49b and CD229 subfractionated subsets in female and male mice. **(A):** Sort purity analysis of CD49b<sup>-</sup>CD229<sup>-</sup>, CD49b<sup>-</sup>CD229<sup>+</sup>, CD49b<sup>+</sup>CD229<sup>-</sup>, and CD49b<sup>+</sup>CD229<sup>+</sup> populations pre-gated on Lineage<sup>-</sup>Sca-1<sup>+</sup>c-kit<sup>+</sup>CD48<sup>-</sup>CD34<sup>-</sup>CD150<sup>hi</sup> (CD150<sup>hi</sup>). Sort purity is represented as mean  $\pm$  SD for each subset, from 4 experiments **(B):** Frequency of CD49b<sup>-</sup>CD229<sup>-</sup>, CD49b<sup>-</sup>CD229<sup>+</sup>, CD49b<sup>+</sup>CD229<sup>-</sup>, and CD49b<sup>+</sup>CD229<sup>+</sup> subsets within the phenotypic HSC compartment (CD150<sup>hi</sup>) of young adult mice, separated into females and males. n = 9 females, 13 males from 9 experiments **(C):** Cell cycle analysis of CD49b<sup>-</sup>CD229<sup>-</sup>, CD49b<sup>-</sup>CD229<sup>+</sup>, CD49b<sup>+</sup>CD229<sup>-</sup>, and CD49b<sup>+</sup>CD229<sup>+</sup> subsets by Ki-67 and DAPI staining in young adult mice, separated into females and males. Frequency of cells in G0 (left) and G1 (right) phases are shown. n = 6 females, 3 males from 2 experiments. **(D):** Cell proliferation analysis by BrdU incorporation in young adult mice, separated into females and males. Frequencies of BrdU<sup>+</sup> CD49b<sup>-</sup>CD229<sup>-</sup>, CD49b<sup>-</sup>CD229<sup>+</sup>, CD49b<sup>+</sup>CD229<sup>-</sup>, and CD49b<sup>+</sup>CD229<sup>+</sup> cells are shown. n = 5 females, 3 males from 2 experiments. **(E):** Transplantation success rate of transplanted CD49b<sup>-</sup>CD229<sup>-</sup>, CD49b<sup>-</sup>CD229<sup>+</sup>, CD49b<sup>+</sup>CD229<sup>-</sup>, and CD49b<sup>+</sup>CD229<sup>+</sup> cells.

Statistical analysis was performed with the Mann-Whitney test in (B-D) between female and male groups within the same subset. All data are represented as mean  $\pm$  SD. Abbreviations: BrdU, Bromodeoxyuridine.

Figure S2, related to Figure 2

A

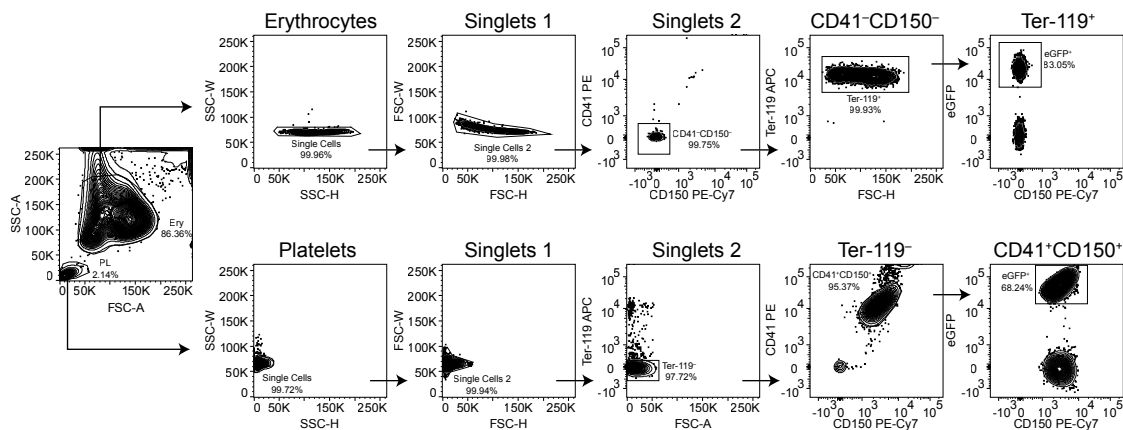

B

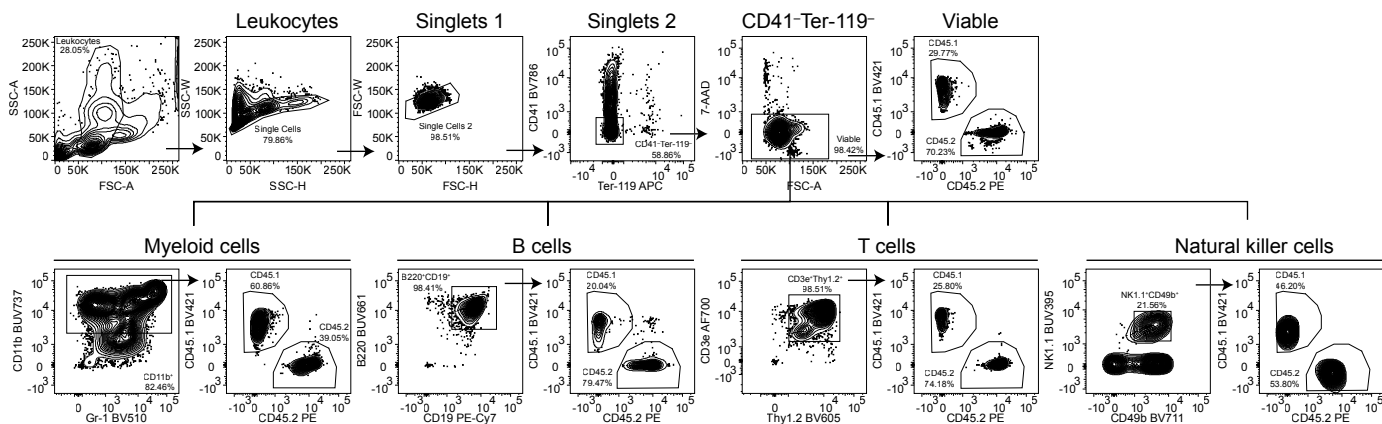

**Supplementary Figure S2, related to Figure 2.** Flow cytometry analysis and gating strategies. **(A):** Representative FACS profile and gating strategy of platelet and erythrocyte lineages in the peripheral blood. Platelet:  $CD41^+CD150^+Ter-119^-$ ; Erythrocyte:  $Ter-119^+CD41^-CD150^-$ . **(B):** Representative FACS profile and gating strategy of myeloid, B, T, and natural killer (NK) cell lineages in the peripheral blood. Donor leukocytes:  $CD45.2^+$ ; myeloid cell:  $CD11b^+B220^-CD19^-NK1.1^-CD49b^-CD3e^-Thy1.2^-CD41^-Ter-119^-$ ; B cell:  $B220^+CD19^+CD11b^-Gr-1^-NK1.1^-CD49b^-CD3e^-Thy1.2^-CD41^-Ter-119^-$ ; T cell:  $CD3e^+Thy1.2^+CD11b^-Gr-1^-NK1.1^-CD49b^-B220^-CD19^-CD41^-Ter-119^-$ ; NK cell:  $NK1.1^+CD49b^+CD3e^-Thy1.2^-CD11b^-Gr-1^-B220^-CD19^-CD41^-Ter-119^-$ . Frequency of parent gates are shown in all FACS plots.

Figure S3, related to Figure 2

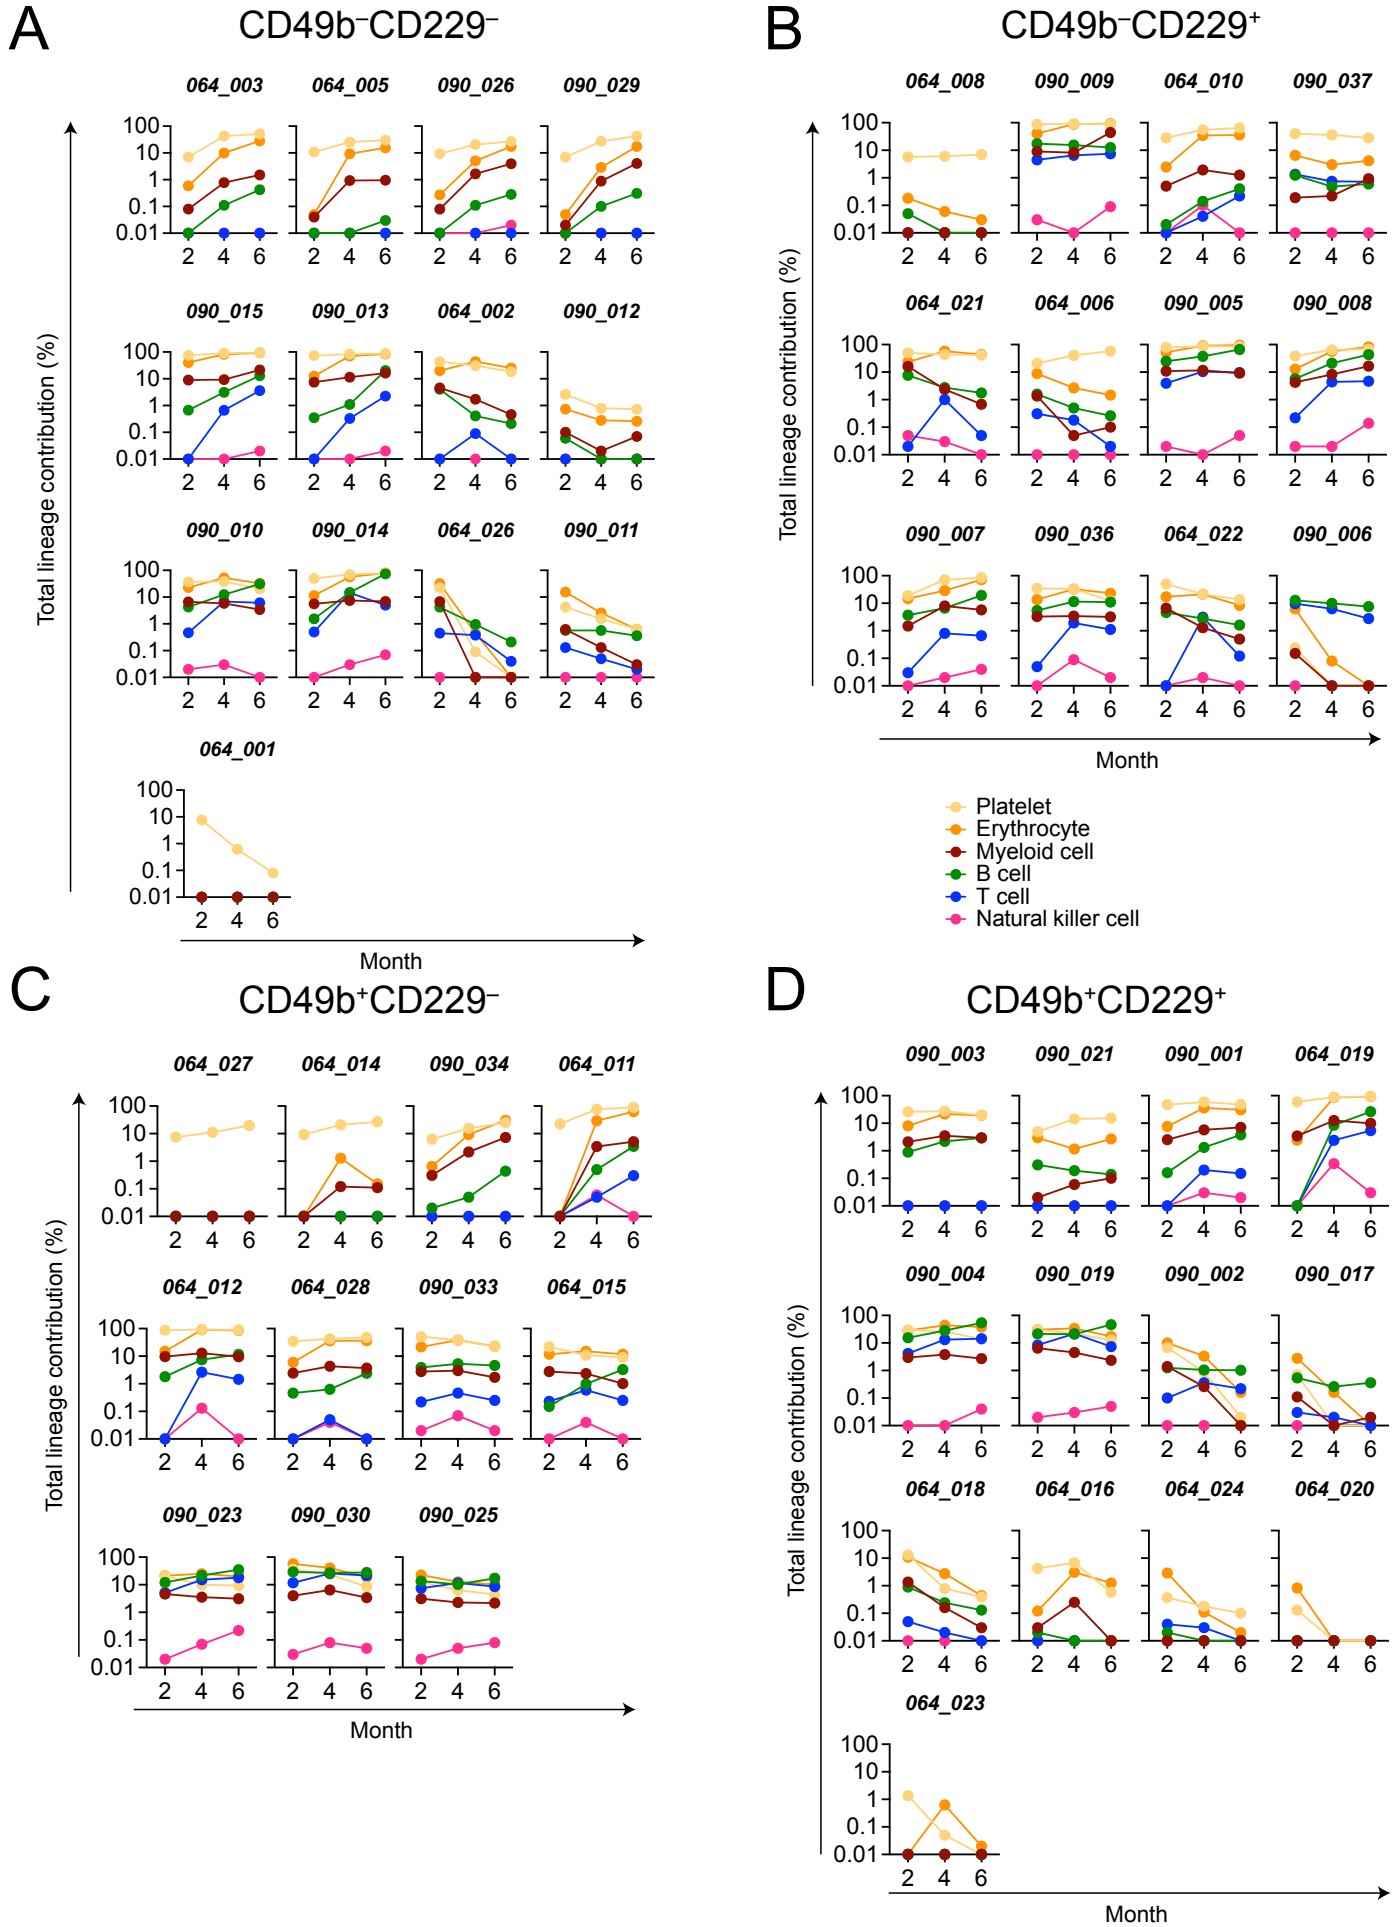

**Supplementary Figure S3, related to Figure 2.** Blood repopulation patterns of primary transplanted mice. **(A-D)**: Frequency of mature lineage repopulation in peripheral blood 2-, 4-, and 6-months post-transplantation. Individual mice, each transplanted with 5 cells from the CD49b<sup>-</sup>CD229<sup>-</sup> subset in (A), CD49b<sup>-</sup>CD229<sup>+</sup> subset in (B), CD49b<sup>+</sup>CD229<sup>-</sup> subset in (C), and CD49b<sup>+</sup>CD229<sup>+</sup> subset in (D) are shown. Data are represented as mean  $\pm$  SD.

Figure S4, related to Figure 2

A

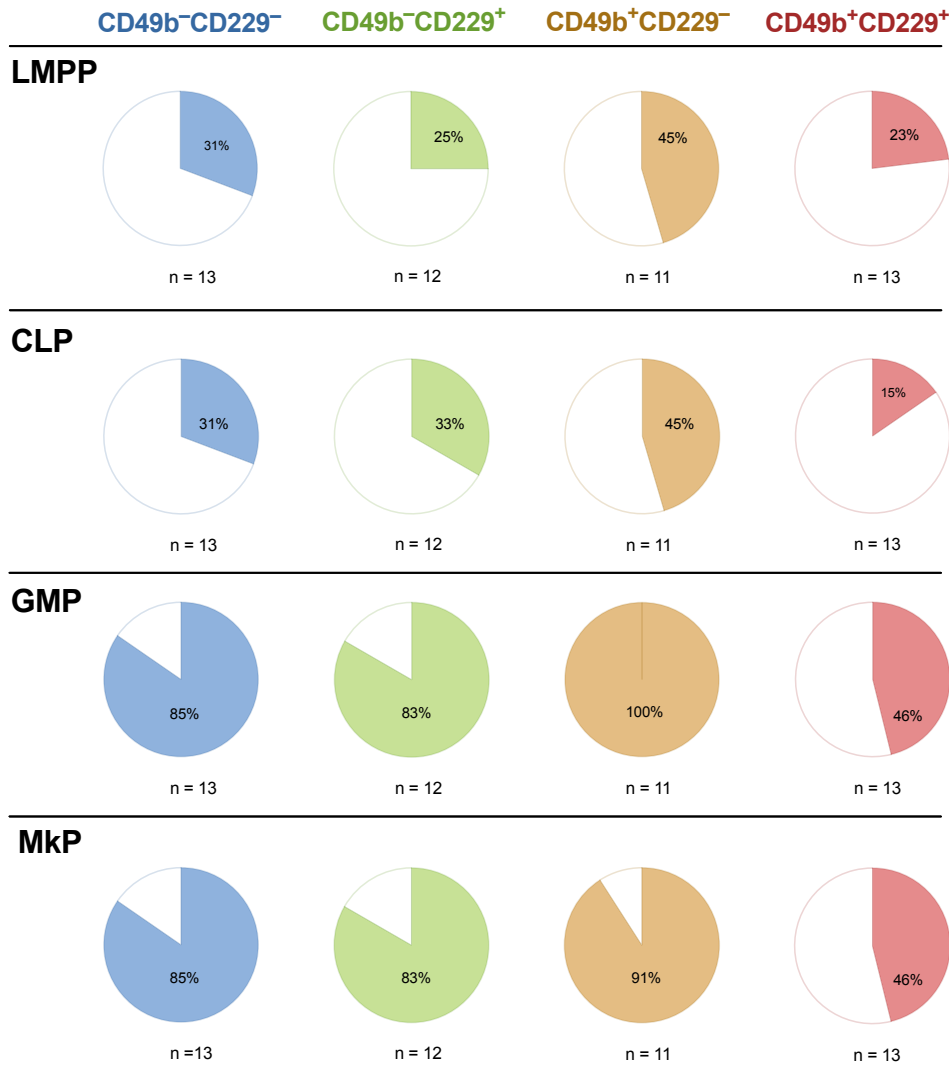

B

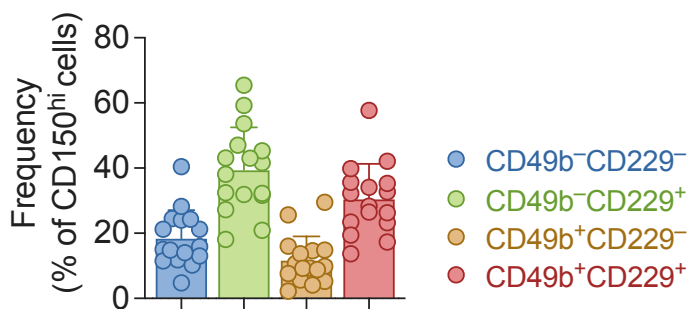

C

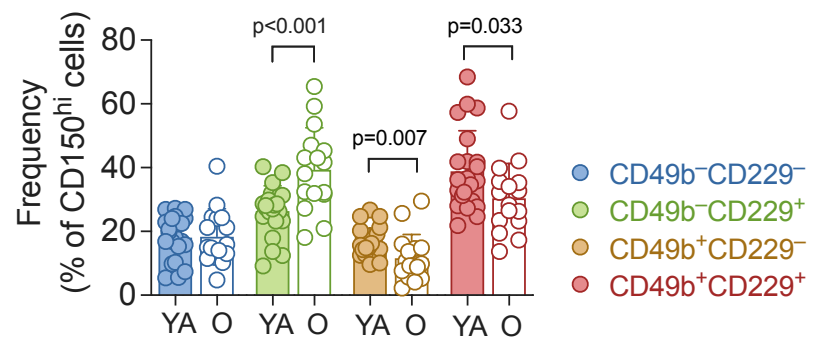

**Supplementary Figure S4, related to Figure 2.** Repopulation of the bone marrow progenitor compartment and CD49b and CD229 subfractionation in aging. **(A):** Proportion of mice with LMPP, CLP, GMP, and MkP repopulation 6 months post-transplantation.  $n_{CD49b^-CD229^-} = 13$  mice,  $n_{CD49b^-CD229^+} = 12$  mice,  $n_{CD49b^+CD229^-} = 11$  mice, and  $n_{CD49b^+CD229^+} = 13$  mice, 2 experiments. **(B):** Frequency of CD49b<sup>-</sup>CD229<sup>-</sup>, CD49b<sup>-</sup>CD229<sup>+</sup>, CD49b<sup>+</sup>CD229<sup>-</sup>, and CD49b<sup>+</sup>CD229<sup>+</sup> subsets within the phenotypic HSC compartment (Lineage<sup>-</sup>Sca-1<sup>c</sup>-kit<sup>+</sup>CD48<sup>-</sup>CD34<sup>-</sup>CD150<sup>hi</sup>) of old mice. n = 16 biological replicates, 10 experiments. **(C):** Comparison of the frequency of CD49b<sup>-</sup>CD229<sup>-</sup>, CD49b<sup>-</sup>CD229<sup>+</sup>, CD49b<sup>+</sup>CD229<sup>-</sup>, and CD49b<sup>+</sup>CD229<sup>+</sup> subsets in young adult and old mice from Fig. 1B and Fig. S4B.

Statistical analysis was performed with the Mann-Whitney test in (C). Data are represented as mean  $\pm$  SD in (B-C). Abbreviations: LMPP (Lymphoid-primed multipotent progenitor): Lineage<sup>-</sup>Sca-1<sup>c</sup>-kit<sup>+</sup>Flt-3<sup>hi</sup>; CLP (Common lymphoid progenitor): Lineage<sup>-</sup>B220<sup>low</sup>Sca-1<sup>low</sup>c-kit<sup>low</sup>Flt-3<sup>hi</sup>IL-7Ra<sup>+</sup>; MkP (Megakaryocyte progenitor): Lineage<sup>-</sup>Sca-1<sup>c</sup>-kit<sup>+</sup> (LK) CD150<sup>+</sup>CD41<sup>+</sup>; GMP (Granulocyte-monocyte progenitor): LK CD41<sup>-</sup>CD150<sup>-</sup>CD16/32<sup>+</sup>; YA, young adult; O, old.



**Supplementary Table S1. Antibody list**

| Antigen                                             | Clone   | Supplier                | Order number |
|-----------------------------------------------------|---------|-------------------------|--------------|
| <b>Donor and recipient</b>                          |         |                         |              |
| Anti-mouse CD45.2 (Ly5.2) PE                        | 104     | BioLegend               | 109808       |
| Anti-mouse CD45.1 (Ly5.1) BV421                     | A20     | BD Biosciences          | 563983       |
| Anti-mouse CD45.1 (Ly5.1) BUV395                    | A20     | BD Biosciences          | 565212       |
| <b>Live/Dead, cell proliferation and cell cycle</b> |         |                         |              |
| 7-AAD                                               |         | BD Biosciences          | 559925       |
| DAPI                                                |         | ThermoFisher Scientific | D3571        |
| BrdU PE                                             |         | BD Biosciences          | 556029       |
| Anti-mouse/Human Ki-67 PE                           |         | BD Biosciences          | 567719       |
| Ki-67 FITC                                          |         | BD Biosciences          | 556026       |
| <b>Hematopoietic cells</b>                          |         |                         |              |
| Anti-mouse CD19 PE-Cy7                              | 6D5     | BioLegend               | 115520       |
| Anti-mouse CD45R/B220 BUV395                        | RA3-6B2 | BD Biosciences          | 563793       |
| Anti-mouse CD45R/B220 BUV661                        | RA3-6B2 | BD Biosciences          | 565077       |
| Anti-mouse/Human CD45R/B220 PE-Dazzle 594           | RA3-6B2 | BioLegend               | 103258       |
| Anti-mouse/Human CD45R/B220 BV510                   | RA3-6B2 | BioLegend               | 103248       |
| Anti-mouse CD11b (Mac-1) BUV395                     | M1/70   | BD Biosciences          | 563553       |
| Anti-mouse CD11b (Mac-1) BUV737                     | M1/70   | BD Biosciences          | 564443       |
| Anti-mouse/Human CD11b (Mac-1) BV510                | M1/70   | BioLegend               | 101263       |
| Anti-mouse F4/80 APC                                | BM8     | BioLegend               | 123116       |
| Anti-mouse F4/80 APC                                | BM8     | ThermoFisher Scientific | 17-4801-82   |
| Anti-mouse Gr-1 BV510                               | RB6-8C5 | BioLegend               | 108437       |
| Anti-mouse Gr-1 BUV395                              | RB6-8C5 | BD Biosciences          | 563849       |
| Anti-mouse Gr-1 (Ly-6G/Ly-6C) PE                    | RB6-8C5 | BD Biosciences          | 553128       |
| Anti-mouse Thy1.2 BV605                             | 53-2.1  | BioLegend               | 140318       |
| Anti-mouse CD3e AF700                               | 500A2   | BD Biosciences          | 557984       |

| Antigen                                 | Clone        | Supplier                | Order number |
|-----------------------------------------|--------------|-------------------------|--------------|
| Anti-mouse CD3e BV510                   | 145-2C11     | BioLegend               | 100353       |
| Anti-mouse CD3e BUV395                  | 1451-2C11    | BD Biosciences          | 563565       |
| Anti-mouse CD4 BUV395                   | RM4-5        | BD Biosciences          | 740208       |
| Anti-mouse CD5 BV510                    | 53-7.3       | BioLegend               | 100627       |
| Anti-mouse CD5 BUV395                   | 53-7.3       | BD Biosciences          | 740206       |
| Anti-mouse CD8a BUV395                  | 53-6.7       | BD Biosciences          | 563786       |
| Anti-mouse NK1.1 BUV395                 | PK136        | BD Biosciences          | 564144       |
| Anti-mouse CD41 BV786                   | MWRReg30     | BD Biosciences          | 740903       |
| Anti-mouse CD41 PE                      | eBioMWRReg30 | ThermoFisher Scientific | 12-0411-83   |
| Anti-mouse Ter-119 BV510                | TER-119      | BD Biosciences          | 563995       |
| Anti-mouse Ter-119 BV650                | TER-119      | BD Biosciences          | 747739       |
| Anti-mouse Ter-119 BUV395               | TER-119      | BD Biosciences          | 563827       |
| Anti-mouse Ter-119 APC                  | TER-119      | Proteintech             | APC-65149    |
| Anti-mouse CD229 (Ly9) Biotin           | Ly9ab3       | BioLegend               | 122903       |
| Anti-mouse/Human/Rat Streptavidin BV421 |              | BioLegend               | 405226       |
| Anti-mouse CD229 (Ly9) BV421            | Ly9.7.144    | BD Biosciences          | 748251       |
| Anti-mouse CD229 (Ly9) BUV805           | Ly9.7.144    | BD Biosciences          | 749390       |
| Anti-mouse CD49b PE-Cy7                 | HMA2         | BioLegend               | 103518       |
| Anti-mouse CD49b AF647                  | HMA2         | BioLegend               | 103511       |
| Anti-mouse CD49b BV711                  | HMA2         | BD Biosciences          | 740704       |
| Anti-mouse CD150 (SLAM) BV785           | TC15-12F12.2 | BioLegend               | 115937       |
| Anti-mouse CD150 (SLAM) PE-Cy7          | TC15-12F12.2 | BioLegend               | 115914       |
| Anti-mouse CD34 FITC                    | RAM34        | ThermoFisher Scientific | 11-0341-85   |
| Anti-mouse CD34 AF647                   | RAM34        | BD Biosciences          | 560230       |
| Anti-mouse CD48 AF700                   | HM48-1       | BioLegend               | 103426       |
| Anti-mouse CD48 APC                     | HM48-1       | BioLegend               | 103412       |
| Anti-mouse CD117 (c-kit) APC-eF780      | 2B8          | ThermoFisher Scientific | 47-1171-82   |
| Anti-mouse Sca-1 (Ly-6A/E) BV605        | D7           | BioLegend               | 108134       |
| Anti-mouse Sca-1 (Ly-6A/E) BV650        | D7           | BD Biosciences          | 740450       |

| Antigen                                | Clone   | Supplier                | Order number |
|----------------------------------------|---------|-------------------------|--------------|
| Anti-mouse CD105 (Endoglin) BV650      | MJ7/18  | BD Biosciences          | 740609       |
| Anti-mouse CD135 (Flt-3) PE            | A2F10   | BioLegend               | 135306       |
| Anti-mouse CD135 (Flt-3) BV421         | A2F10.1 | BD Biosciences          | 562898       |
| Anti-mouse CD127 (IL7-Ra) BV711        | A7R34   | BioLegend               | 135035       |
| Anti-mouse CD16/32 AF700               | 93      | ThermoFisher Scientific | 56-0161-82   |
| Anti-mouse CD16/32 BUV737              | AB93    | BD Biosciences          | 751697       |
| Anti-mouse CD16/32 (Fc-block) Purified | 2.4G2   | BD Biosciences          | 553142       |
